# Supplementary material
Source: ML conference proceedings conference paper supplement (https://aclanthology.org/D18-1196)
Supplement: Attachment [file D18-1196.Attachment.zip]

## A Supplementary Material

### A.1 Edge case handling: overlapping arguments

Occasionally, a word may be part of multiple arguments of the same connective (e.g., both the Cause and the Effect). For example, in *This equipment is newer and thus safer*, the Cause and Effect of *thus* would respectively be annotated as *this equipment is newer* and *this equipment is safer*. When processing such a shared word, the DeepCx algorithm issues an arc transition that includes both argument names (e.g., LEFT-ARC<sub>Cause,Means</sub>). From the tagger’s standpoint, this is an entirely separate transition from, say, LEFT-ARC<sub>Cause</sub> or LEFT-ARC<sub>Means</sub>.

When executing an action with multiple argument types, a separate arc is added to  $A$  for each argument type—i.e., the word is added to both argument spans.

### A.2 Parser details

The LSTM parser assumes its input has already been split into sentences and POS-tagged. These preprocessing steps are performed using Stanford CoreNLP (Manning et al., 2014).

### A.3 Constraints on transition ordering

As mentioned in §4, several transitions have constraints on their ordering to ensure semantic well-formedness. The following constraints apply:

- A CONN-FRAG may not immediately follow a SPLIT or another CONN-FRAG.
- A SPLIT may not immediately follow a CONN-FRAG or another SPLIT.
- A SPLIT is permitted only if the connective currently under construction has at least one fragment—i.e., it contains at least two words.
- NO-CONN is forbidden if  $s$  is true, i.e., if  $a$  has been determined to be a connective anchor.

These are enforced at each timestep, both at training and test time, by eliminating violating transitions from the tagger’s set of available next actions.

### A.4 Neural network details and training parameters

Each LSTM is initialized with its own default item whose values are trained parameters.

We followed the training parameters of Dyer et al. (2015): we used gradient descent for parameter optimization, with an initial learning rate of

$\eta_0 = 0.1$  and updates of  $\eta_t = \eta_0 / (1 + 0.8t)$  after each epoch  $t$ ; we clipped the  $\ell_2$  norm of the gradients to 5; and we applied an  $\ell_2$  penalty of  $10^{-6}$  to all weights. We also used Glorot initialization (Glorot and Bengio, 2010) for all parameters. Each fold took about 40 minutes to train on a single core of a 3.10-GHz processor.
